# Supplementary material
Source: HighWire-hosted journal article supplement (https://hw-f5-jim.highwire.org/content/jim-2020-001650)
Supplement: inline-supplementary-material-1 [file inline-supplementary-material-1.pdf]

Long-Term Survival with High Dose Interleukin-2 Therapy

1

2

**SUPPLEMENTAL MATERIAL**

3

## Long-Term Survival with High Dose Interleukin-2 Therapy

1 **Table S1 - Guide to HD IL-2 Treatment Management**2 **1. Patient Selection**

- 3 • Physiologic patient selection is critical to safe administration and ability to tolerate the
- 4 capillary leak syndrome produced by HD IL-2 administration
- 5 • Eligibility includes no or treated ischemic cardiac disease, reasonably normal pulmonary
- 6 function and reasonably normal renal and hepatic function
- 7 • Patients with treated, asymptomatic brain metastases have safely received HD IL-2
- 8 (personal communication, investigators)
- 9 • Patients into their 70's have been successfully treated, having passed this physiologic
- 10 screen

11 **2. HD IL-2 Treatment Course (2 one week cycles separated by one week)**

- 12 • T-cell growth factor (IL-2) activates T-cells, with many downstream effects
- 13 • Toxicity is predictable day by day of treatment cycle
- 14 • Common acute side effects are hypotension, capillary leak, malaise, diarrhea, oliguria,
- 15 alterations in laboratory values which continue with continued treatment
- 16 • Acute toxicities subside/reverse when IL-2 dose is held, or treatment is stopped

17 **3. HD IL-2 Treatment Centers**

- 18 • Physicians and nurses experienced in management of cytokine-related toxicities
- 19 • Provision of monitored setting
- 20 • Some centers utilize:
  - 21 – Step down unit
  - 22 – Stem cell transplant unit – provides nursing intensity
  - 23 – Standard oncology unit, with monitoring capability
  - 24 – Will be same level of care as Car-T cell therapy

25

26

## Long-Term Survival with High Dose Interleukin-2 Therapy

1 **Table S2: Ongoing and Completed Trials of IL-2 and Anti-PD-1 Checkpoint Inhibitors**

2

|                                                      |                                                                                                                                                                   |                           |
|------------------------------------------------------|-------------------------------------------------------------------------------------------------------------------------------------------------------------------|---------------------------|
| <b>Metastatic Renal Cell Cancer</b>                  |                                                                                                                                                                   |                           |
| NCT02964078                                          | 4 Blocks of 9 wks each:<br>Pembro wk 1,4,7<br>HD IL-2, 5 doses over 33 hrs, wks 2,3,<br>5,6 starting second 9 wk block                                            | Ref 24                    |
| NCT02989714                                          | Wk 1, HD IL-2, cycle 1<br>Wk 2, Nivo<br>Wk 3, HD IL-2, cycle 2<br>Wk 4 and every 2 wks, Nivo                                                                      |                           |
| NCT03260504                                          | Pembro, wk 1 and every 3 weeks;<br>IL-2 – Cohort 1, SQ low dose wks 1-6;<br>IL-2 – Cohort 2, low dose IV, wks 1 and 4<br>IL-2 – Cohort 3, HD IL-2, IV wks 1 and 4 |                           |
| <b>Metastatic Melanoma</b>                           |                                                                                                                                                                   |                           |
| NCT02748564                                          | Pembro, wk 0 and every 3 wks;<br>IL-2 – Cohort 1, LD IV, wk 3 and 5<br>IL-2 – Cohort 2, Int Dose IV, wk 3 and 5<br>IL-2 - Cohort 3, HD IL-2 IV, wk 3 and 5        |                           |
| NCT04165967                                          | Adoptive TIL + Nivo + IL-2 in advanced melanoma                                                                                                                   | Swiss CT.Gov listing also |
| <b>Metastatic Melanoma and Metastatic Renal Cell</b> |                                                                                                                                                                   |                           |
| NCT03991130                                          | Nivo day 1 and 35<br>Day 8-12 HD IL-2 cycle 1<br>Day 22-26 HD IL-2 cycle 2                                                                                        |                           |

3 Anti-PD-1 – anti-programmed death-1; wk – week; Pembro - Pembrolizumab; HD IL-2 – high  
4 dose interleukin-2; Nivo – nivolumab; D – day; LD – low dose; SQ – subcutaneous; IV –  
5 intravenous; Int – intermediate; TIL – tumor infiltrating lymphocytes

6

## Long-Term Survival with High Dose Interleukin-2 Therapy

1

**TABLE S3 – PATIENT DEMOGRAPHICS**

2

Characteristics

Metastatic Melanoma

Metastatic Renal Cell

3

(n=54)

(n=46)

|                                                                     |                  |                  |
|---------------------------------------------------------------------|------------------|------------------|
| Sex: Male/Female                                                    | 31/23            | 36/10            |
| Age: Median/range                                                   | 53 years (25-76) | 54 years (39-73) |
| Sites of Metastases:                                                |                  |                  |
| Lymph nodes                                                         | 40%              | 20%              |
| Lung                                                                | 25%              | 50%              |
| Liver                                                               | 17%              | 4%               |
| Bone                                                                | 15%              | 11%              |
| Other –<br>CNS, pancreas, adrenal,<br>spleen, soft tissue, GI tract | 10% or less      | 10% or less      |
|                                                                     |                  |                  |

4 CNS – central nervous system, GI - gastrointestinal

5

6

7

**TABLE S4 - TREATMENT RECEIVED**

8

**ONE COURSE = TWO 1-WEEK CYCLES**

9

Courses (range 0.5-4 courses)

# Patients (n=100)

|             |    |
|-------------|----|
| 0.5 course  | 2  |
| 1 course    | 19 |
| 1.5 courses | 5  |
| 2 courses   | 35 |
| 2.5 courses | 6  |
| 3 courses   | 25 |
| >3 courses  | 1  |
| Unknown     | 7  |
|             |    |
| 2-3 courses | 66 |

10

11

12

13
